# Supplementary material
Source: ML conference proceedings conference paper supplement (https://proceedings.neurips.cc/paper_files/paper/2019/hash/beed13602b9b0e6ecb5b568ff5058f07-Abstract.html)
Supplement: Supplementary file 2 [file beed13602b9b0e6ecb5b568ff5058f07-Supplemental.zip]

Archive with 1 entries (1 files):
- supplementary_383.pdf
